# Supplementary material for: Protective Effect of Piplartine against LPS-Induced Sepsis through Attenuating the MAPKs/NF-κB Signaling Pathway and NLRP3 Inflammasome Activation
Source: MDPI journal article supplement (doi:10.3390/ph14060588), 2021-06-18

**Supplemental Table S1.** List of primary antibodies used in this study.

| Antibodies                   | Catalog number | Company                                      |
|------------------------------|----------------|----------------------------------------------|
| Nitric oxide synthase (iNOS) | sc-651         | Santa Cruz Biotechnology<br>(Santa Cruz, CA) |
| Cyclooxygenase 2 (COX-2)     | sc-166475      | Santa Cruz Biotechnology                     |
| ASC                          | sc-22514-R     | Santa Cruz Biotechnology                     |
| Caspase-1 p10                | sc-514         | Santa Cruz Biotechnology                     |
| IL-1 $\beta$                 | sc-7884        | Santa Cruz Biotechnology                     |
| $\beta$ -tubulin             | sc-5274        | Santa Cruz Biotechnology                     |
| Phospho-ERK1/2               | CST#4370       | Cell Signaling<br>(Farmingdale, NY)          |
| ERK1/2                       | CST#4695       | Cell Signaling                               |
| Phospho-JNK 1/2              | CST#9255       | Cell Signaling                               |
| JNK 1/2                      | CST#9258       | Cell Signaling                               |
| Phospho-p38 MAPK             | CST#4511       | Cell Signaling                               |
| p38 MAPK                     | CST#8690       | Cell Signaling                               |
| Phospho-NF- $\kappa$ B       | CST#3033       | Cell Signaling                               |
| NF- $\kappa$ B p65           | CST#8284       | Cell Signaling                               |
| Phospho-I $\kappa$ B         | CST#2859       | Cell Signaling                               |
| I $\kappa$ B                 | CST#4814       | Cell Signaling                               |
| NLRP3                        | CST#15101      | Cell Signaling                               |
| Cleaved caspase-1            | CST#67314      | Cell Signaling                               |
| Cleaved IL-1 $\beta$         | CST#52718      | Cell Signaling                               |
| $\beta$ -actin               | GTX629630      | GeneTex (Irvine, CA)                         |
| Lamin A+C                    | GTX101127      | GeneTex                                      |

**Supplemental material:** Western blot raw images.  
**Figure.S1**

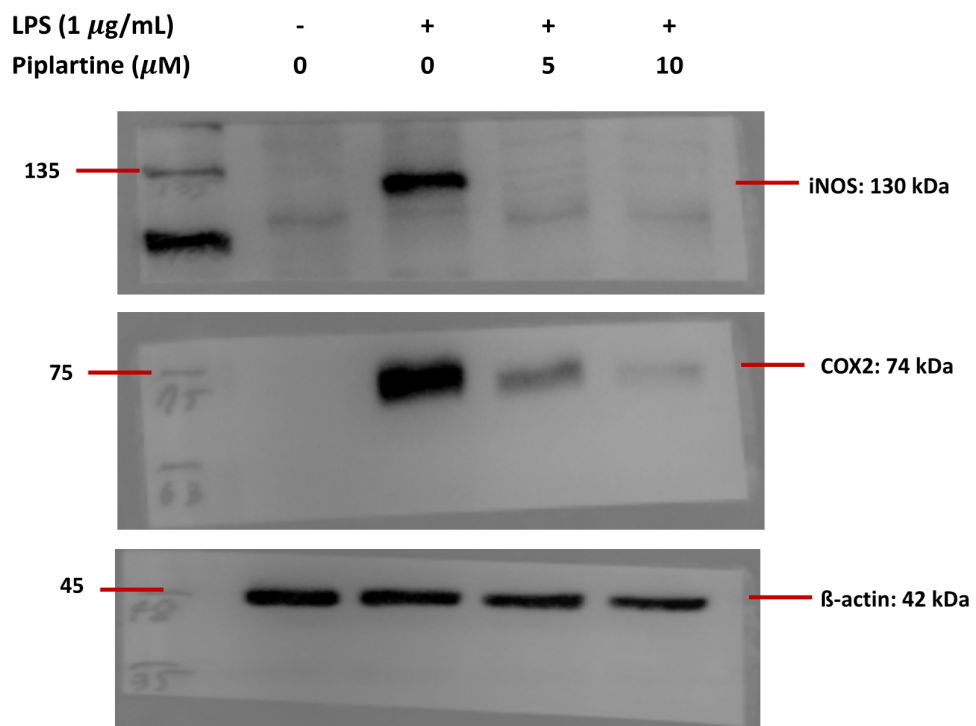

Figure.S2

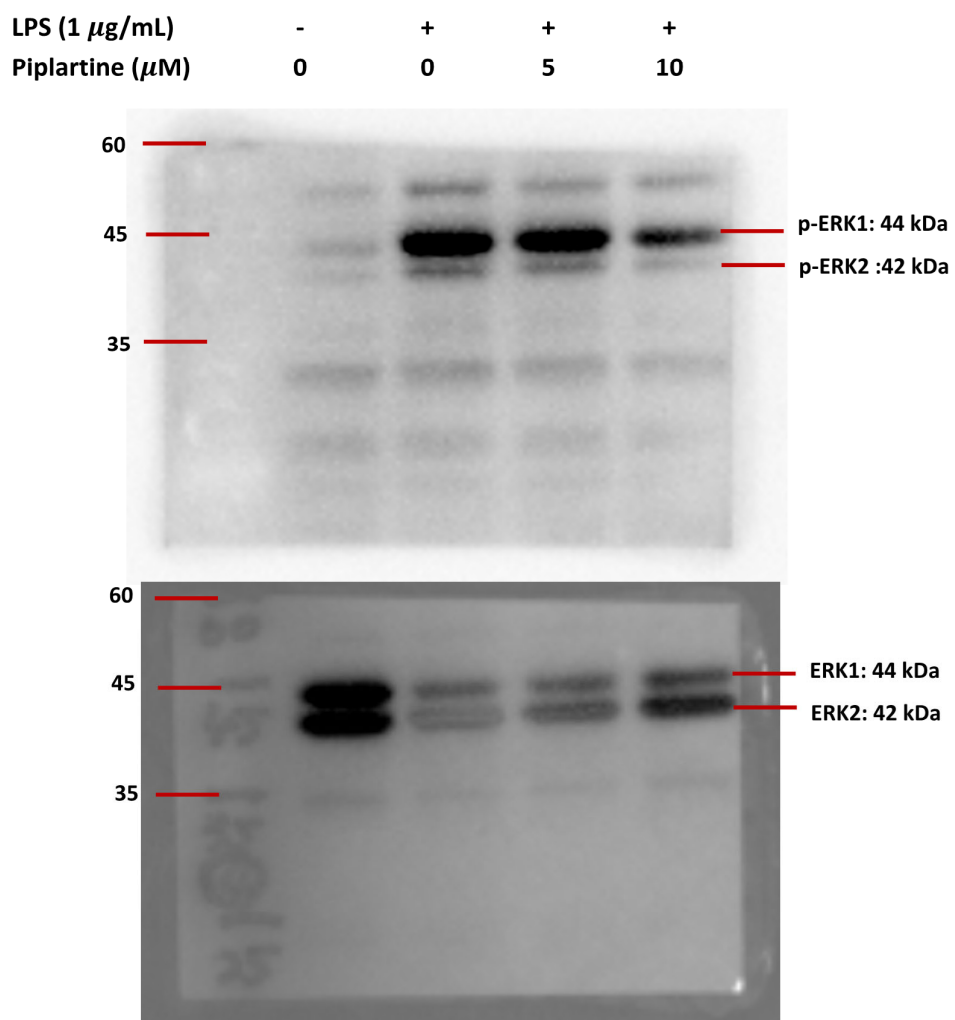

Figure.S2

|                        |   |   |   |    |
|------------------------|---|---|---|----|
| LPS (1 $\mu$ g/mL)     | - | + | + | +  |
| Pipltartine ( $\mu$ M) | 0 | 0 | 5 | 10 |

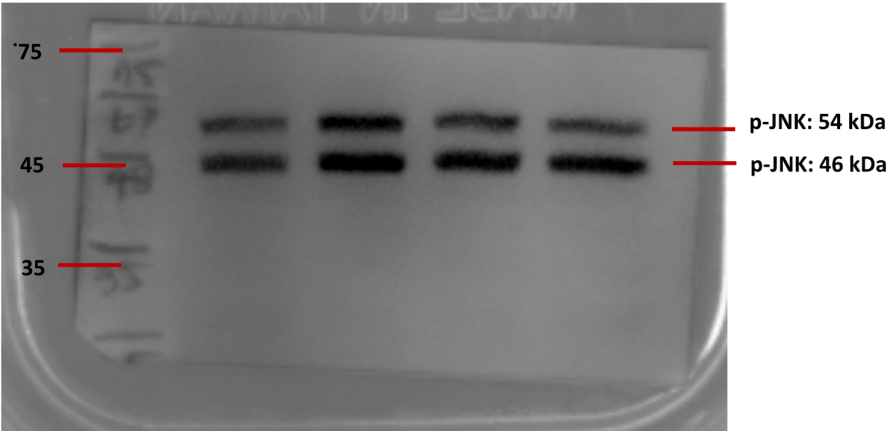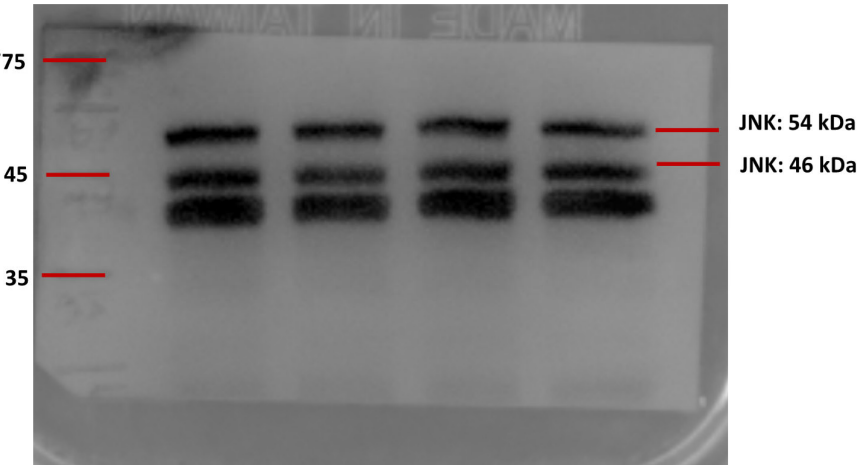

Figure.S2

|                        |   |   |   |    |
|------------------------|---|---|---|----|
| LPS (1 $\mu$ g/mL)     | - | + | + | +  |
| Pipltartine ( $\mu$ M) | 0 | 0 | 5 | 10 |

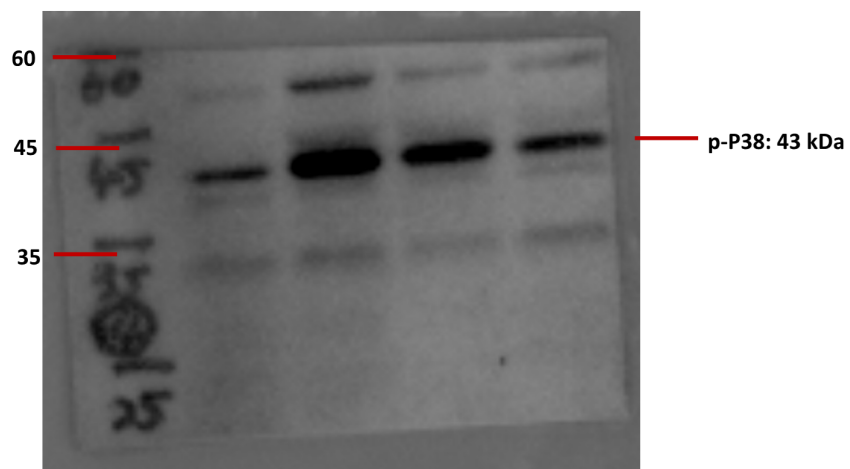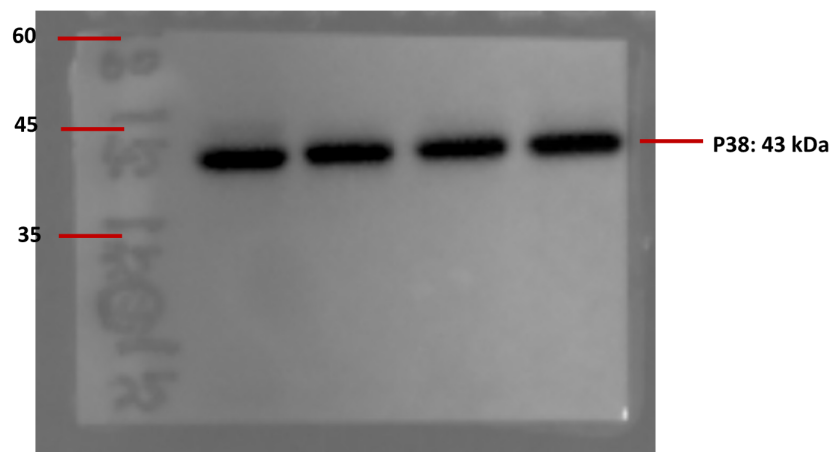

Figure.S2

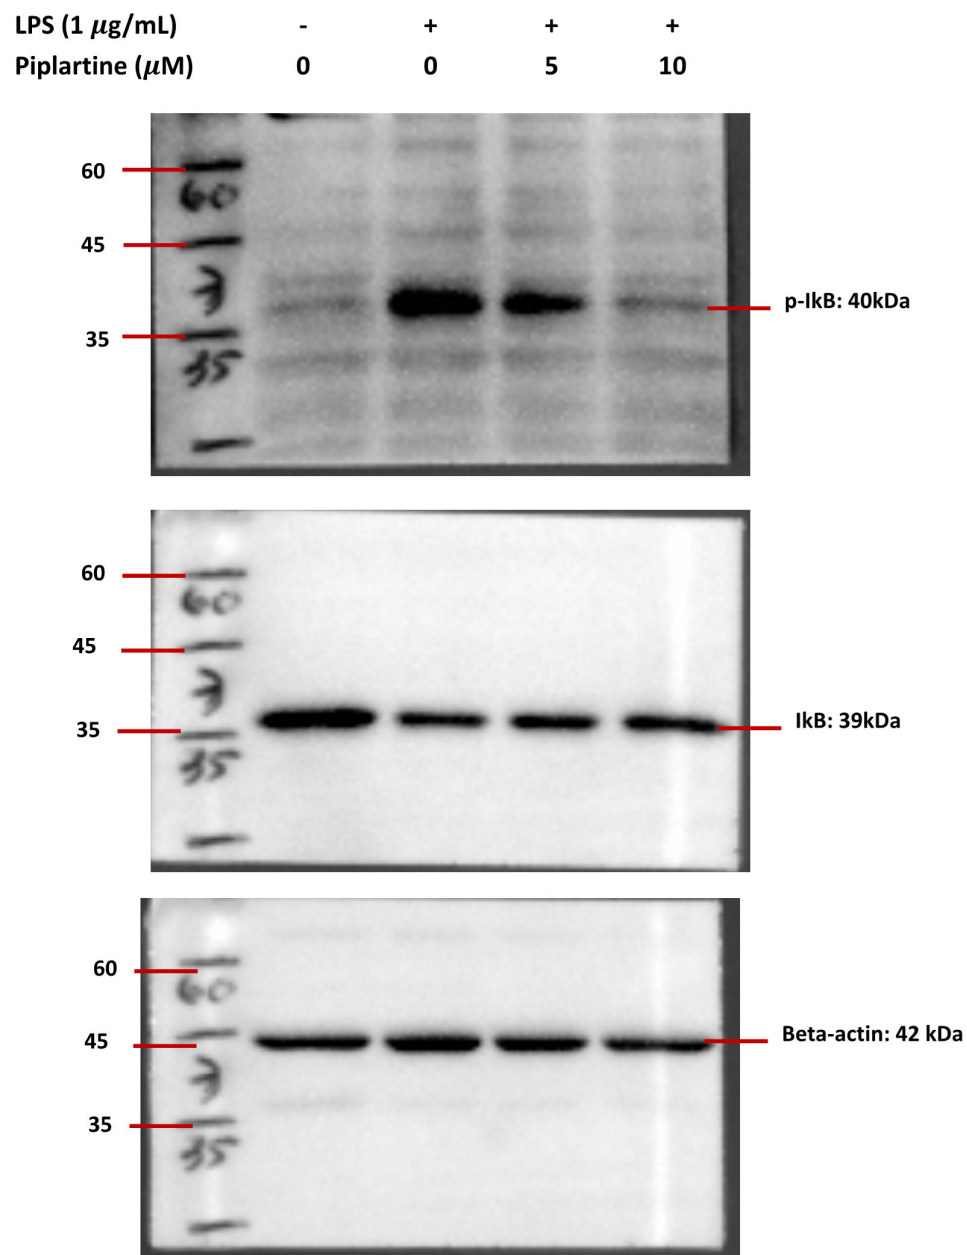

Figure.S2

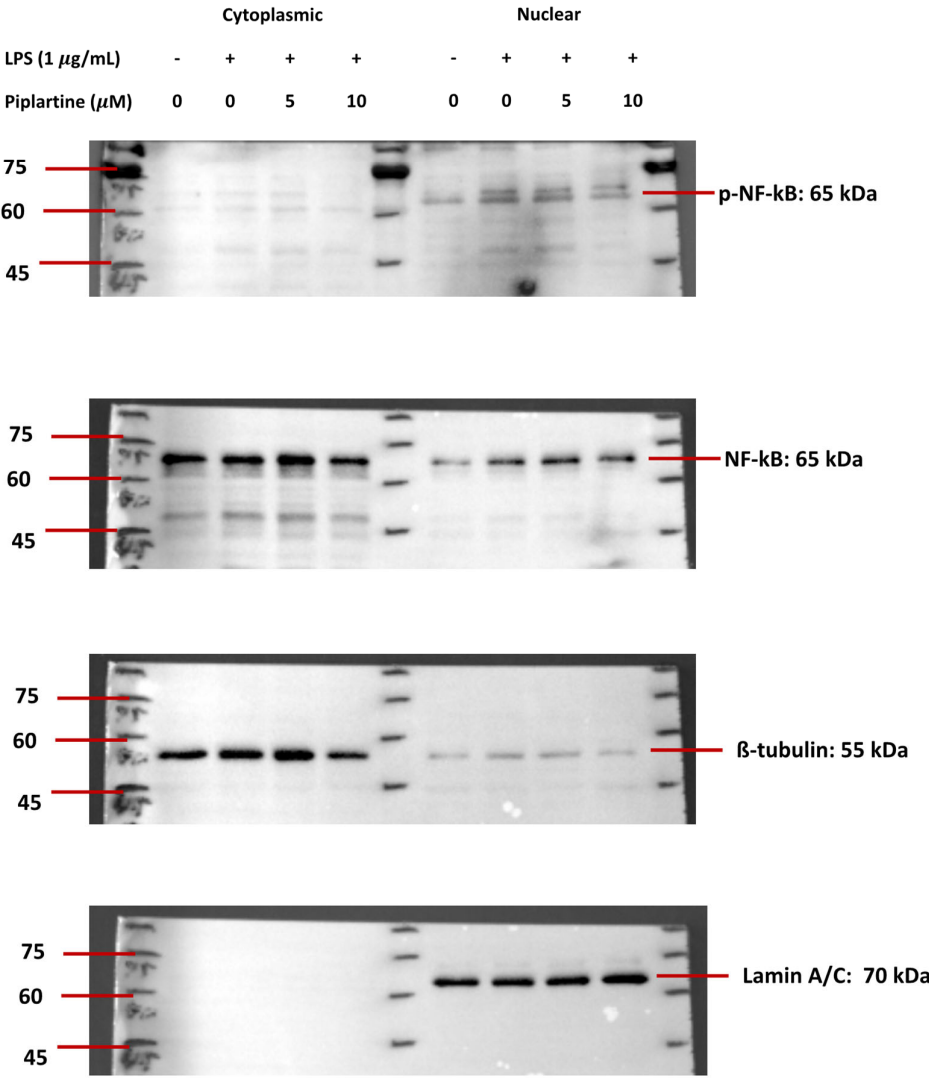

**Figure.S3**

|                               |   |   |   |   |    |
|-------------------------------|---|---|---|---|----|
| LPS (1 $\mu\text{g/mL}$ )     | - | + | + | + | +  |
| Pipltartine ( $\mu\text{M}$ ) | 0 | 0 | 0 | 5 | 10 |
| ATP (5 mM)                    | - | - | + | + | +  |

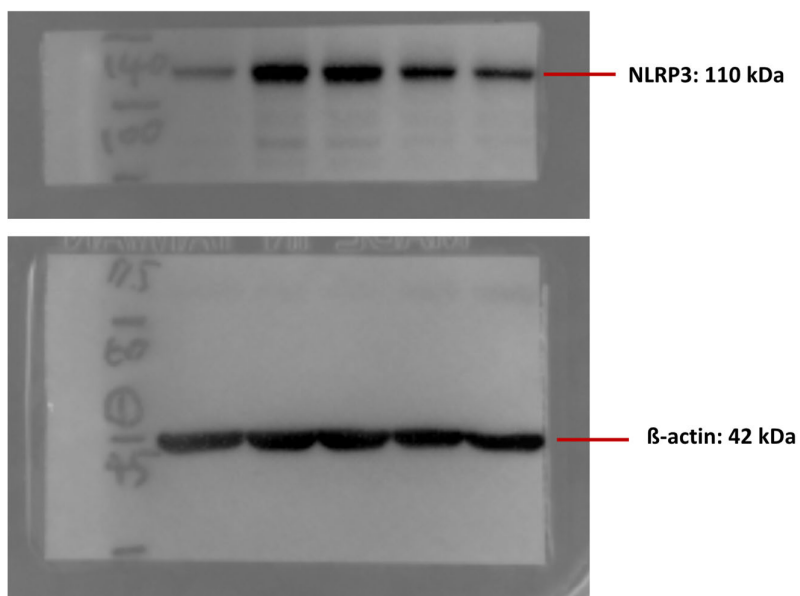



Figure.S3

|                        |   |   |   |   |    |
|------------------------|---|---|---|---|----|
| LPS (1 $\mu$ g/mL)     | - | + | + | + | +  |
| Pipltartine ( $\mu$ M) | 0 | 0 | 0 | 5 | 10 |
| ATP (5 mM)             | - | - | + | + | +  |

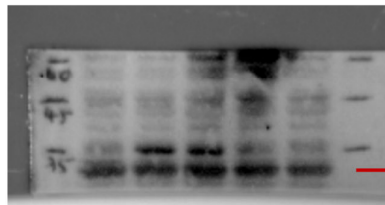

Pro-IL-1 $\beta$ : 32 kDa

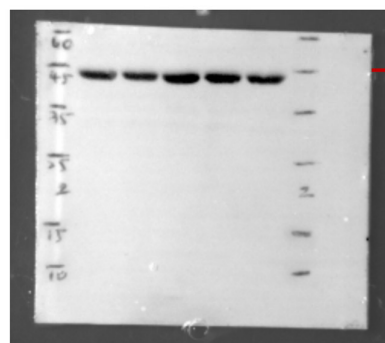

$\beta$ -actin: 42 kDa

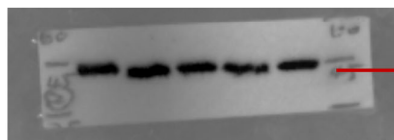

$\beta$ -actin: 42 kDa

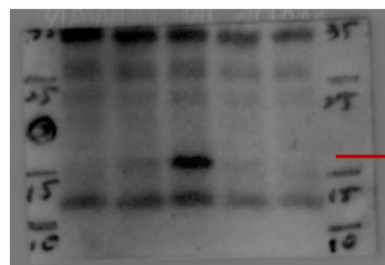

cleaved-IL-1 $\beta$ : 17 kDa

Figure.S3

|                              |   |   |   |   |    |
|------------------------------|---|---|---|---|----|
| LPS (1 $\mu\text{g/mL}$ )    | - | + | + | + | +  |
| Piplartine ( $\mu\text{M}$ ) | 0 | 0 | 0 | 5 | 10 |
| ATP (5 mM)                   | - | - | + | + | +  |

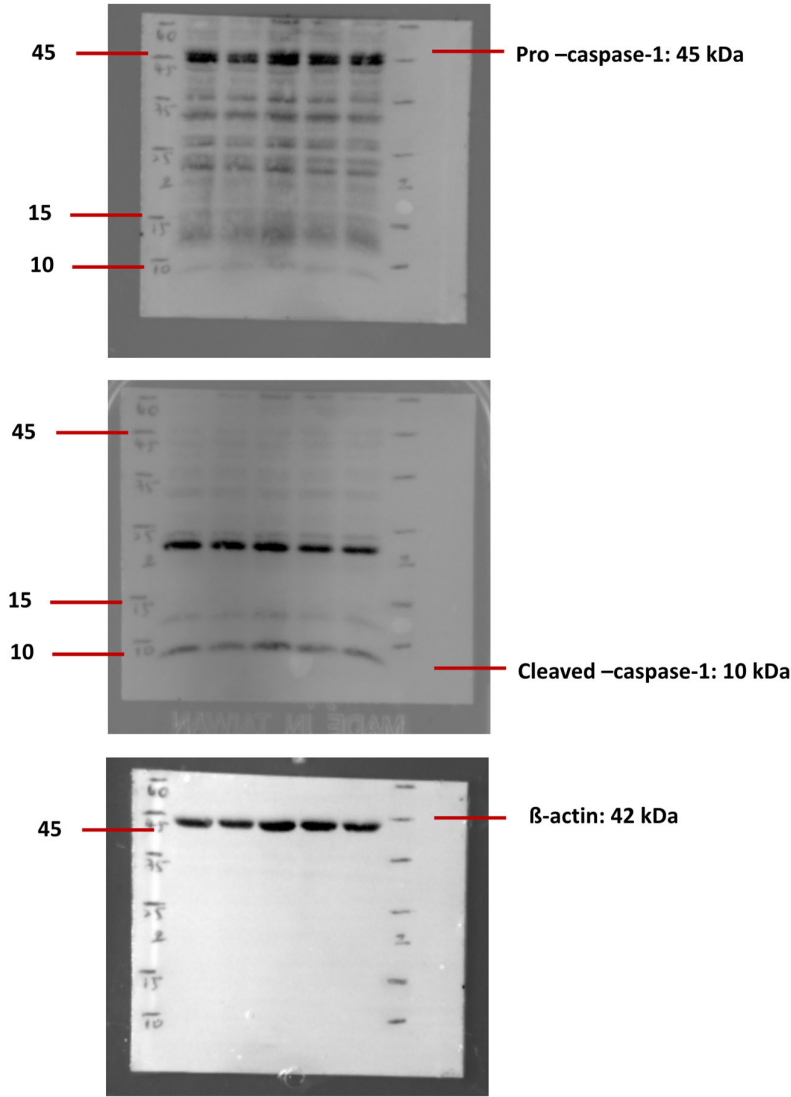

Figure.S3

|                        |   |   |   |   |    |
|------------------------|---|---|---|---|----|
| LPS (1 $\mu$ g/mL)     | - | + | + | + | +  |
| Pipltartine ( $\mu$ M) | 0 | 0 | 0 | 5 | 10 |
| ATP (5 mM)             | - | - | + | + | +  |

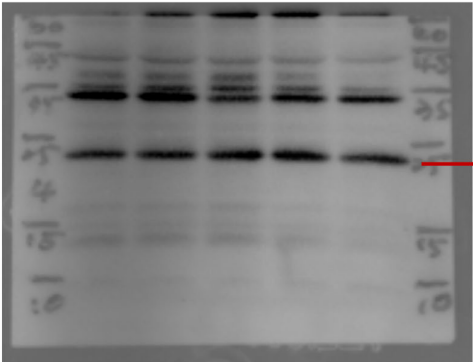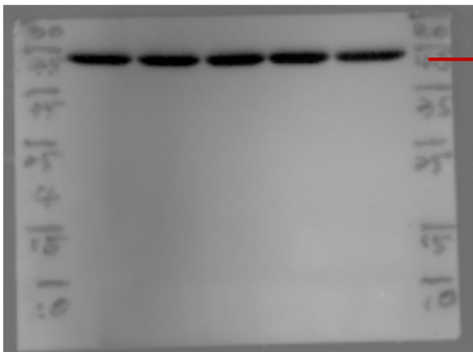

Supplement: s1 [file s1]
